# Supplementary material for: Next-generation cell-penetrating antibodies for tumor targeting and RAD51 inhibition
Source: PubMed Central journal article supplement (PMC11444335; doi:10.18632/oncotarget.28651), 2024-10-01
Supplement: oncotarget-15-28651-s001.pdf [file oncotarget-15-28651-s001.pdf]

## Next-generation cell-penetrating antibodies for tumor targeting and RAD51 inhibition

### SUPPLEMENTARY MATERIALS

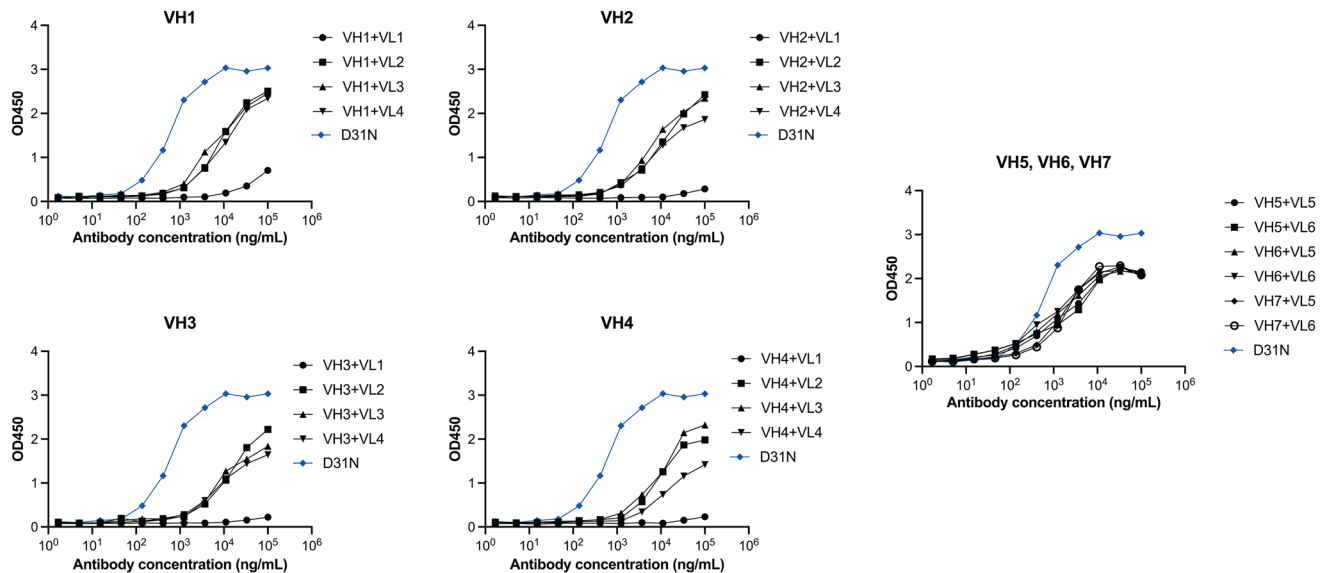

**Supplementary Figure 1: ELISA screening of 22 humanized 3E10 variants for poly(dT)  $EC_{50}$ .** Plots demonstrating the antibody/DNA binding curves from which  $EC_{50}$ s for all variants were mathematically derived. In each experiment, D31N was used as a positive control.

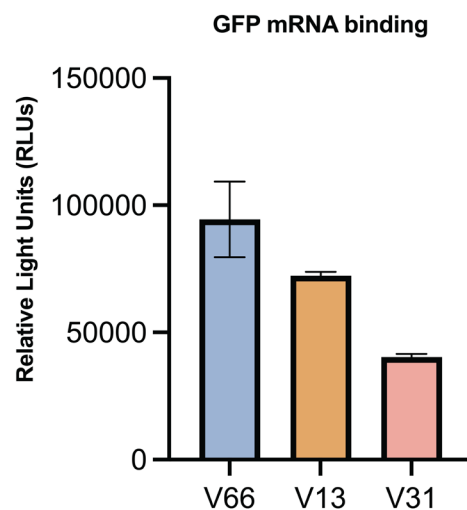

**Supplementary Figure 2: Determination of 3E10 variant GFP mRNA binding affinity.** ELISA assay measuring V66, V13, and V31 affinity to 3'-biotinylated mRNA encoding cytosolic GFP. Data are mean  $\pm$  SEM,  $n = 3$  replicates.

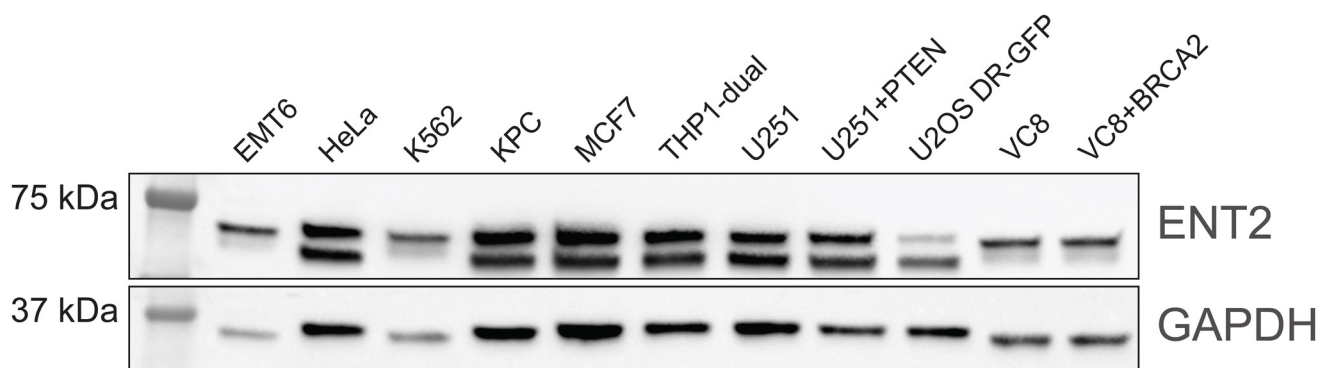

**Supplementary Figure 3: Determination of ENT2 expression in human cell lines.** ENT2 (~60 and ~55 kDa bands) relative abundance in all cell lines used for 3E10 antibody and/or nucleic acid payload uptake was assessed using western blot analysis.
